# Supplementary material for: Daucosterol Alleviates Alcohol−Induced Hepatic Injury and Inflammation through P38/NF−κB/NLRP3 Inflammasome Pathway
Source: MDPI journal article supplement (doi:10.3390/nu15010223), 2023-01-01
Supplement: s1 [file s1]

For all symbols, \*  $p < 0.05$ , \*\*  $p < 0.01$ , \*\*\*  $p < 0.001$

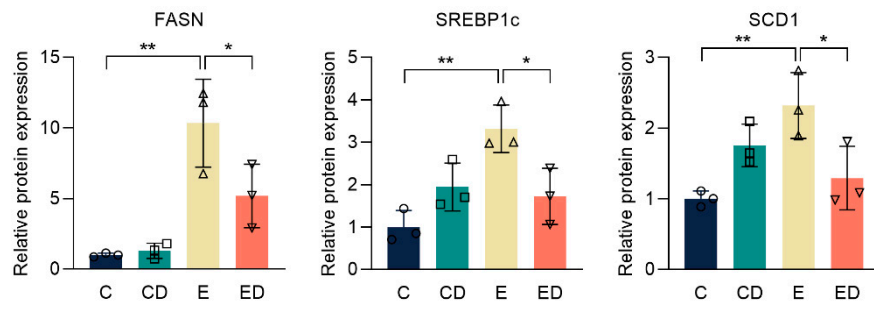

**Figure S1.** Quantitative analysis of protein in Figure 1A.

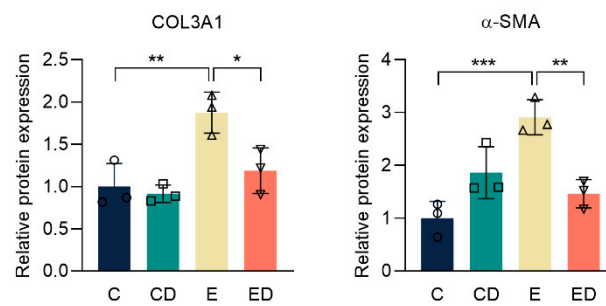

**Figure S2.** Quantitative analysis of protein in Figure 2C.

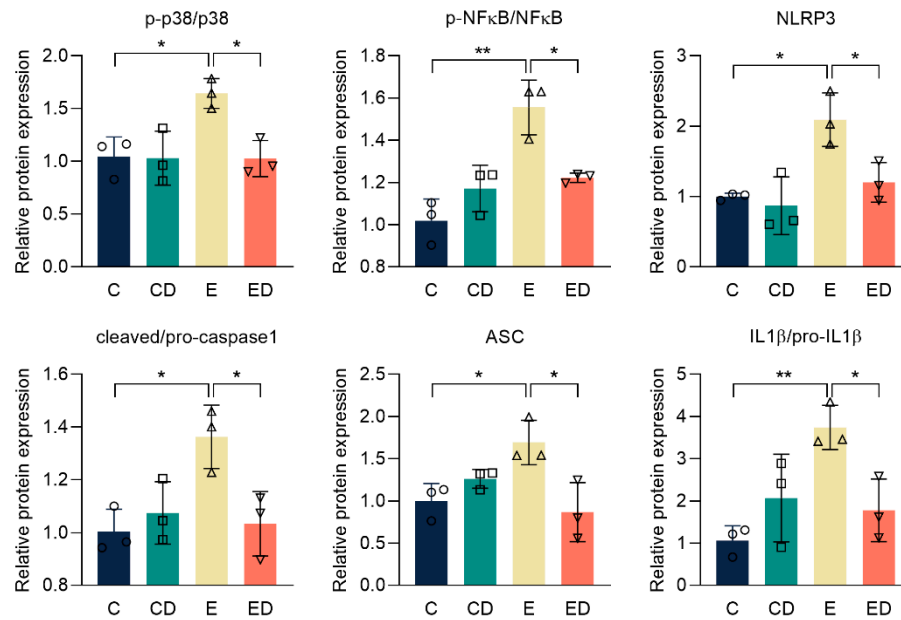

**Figure S3.** Quantitative analysis of protein in Figure 3E.

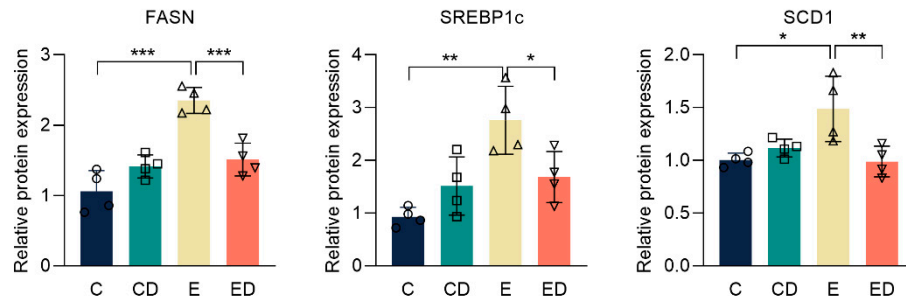

**Figure S4.** Quantitative analysis of protein in Figure 4B.

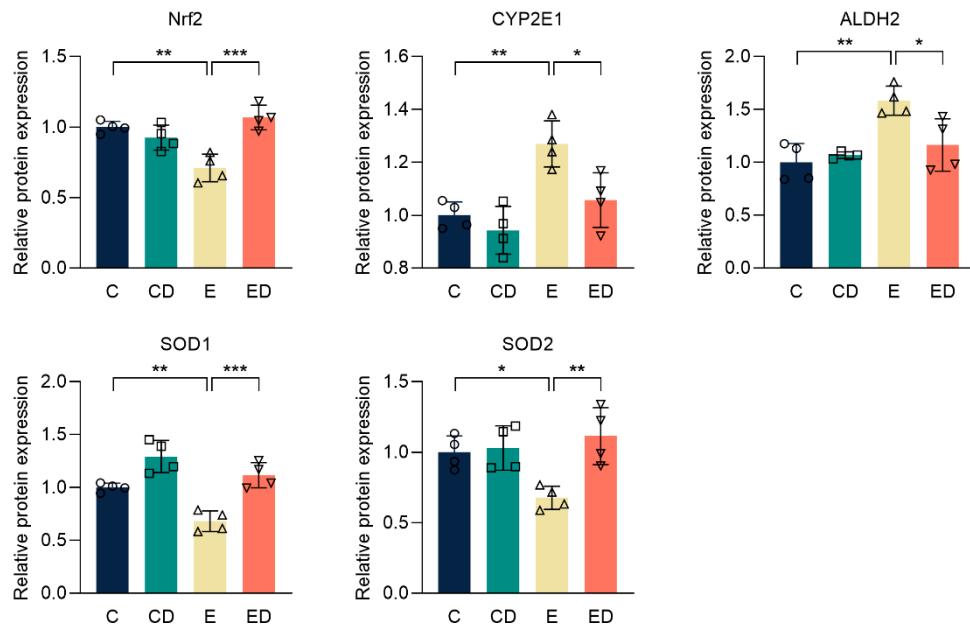

**Figure S5.** Quantitative analysis of protein in Figure 5C.

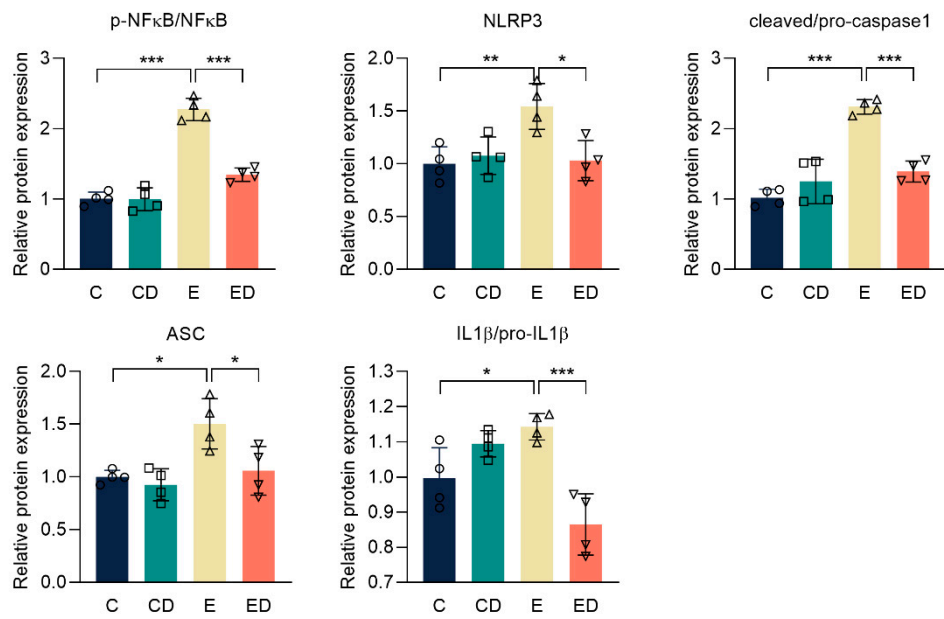

**Figure S6.** Quantitative analysis of protein in Figure 6A

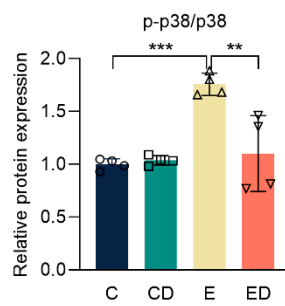

**Figure S7.** Quantitative analysis of protein in Figure 7A.

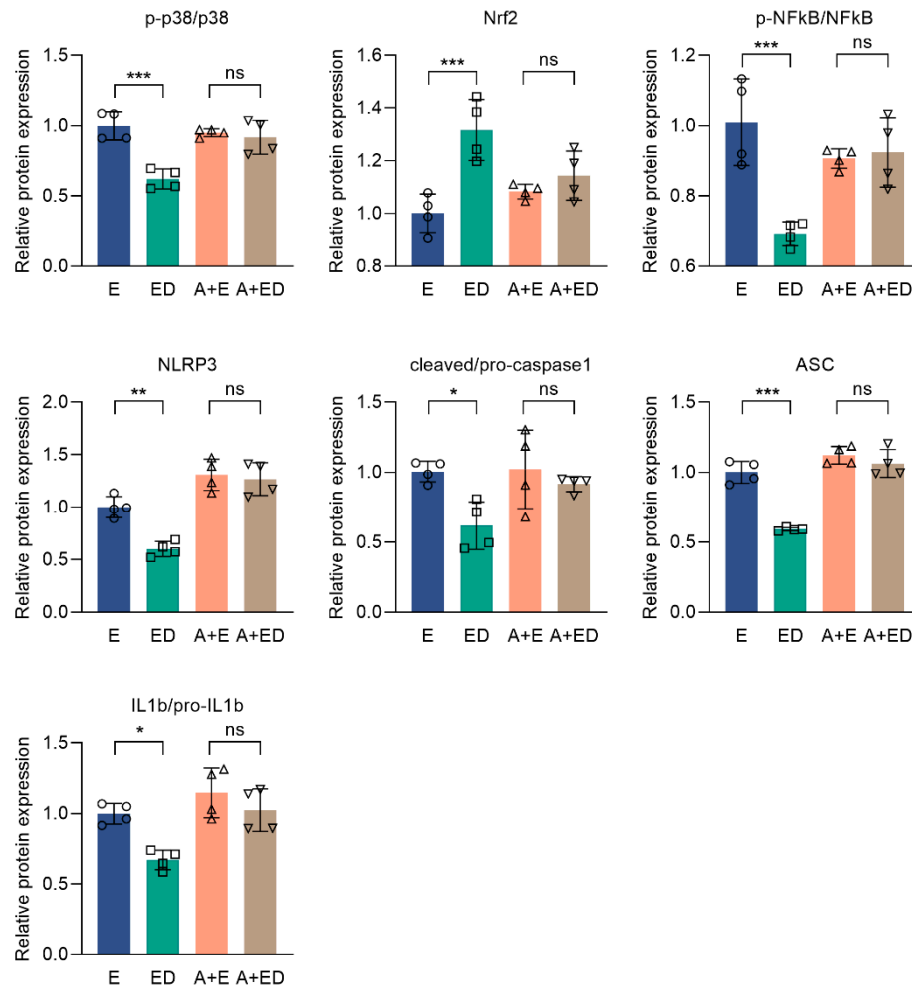

**Figure S8.** Quantitative analysis of protein in Figure 7B.

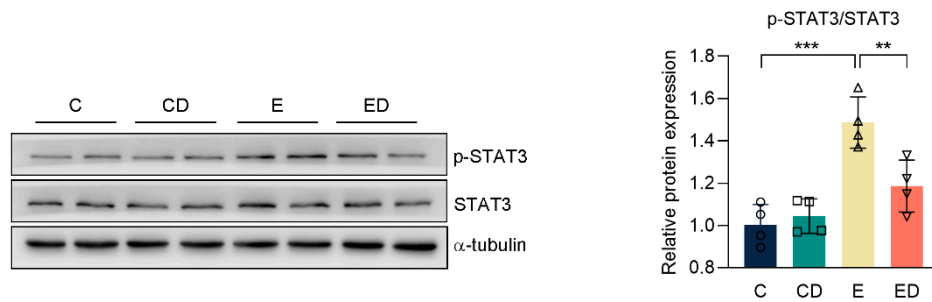

**Figure S9.** Protein expression of p-STAT3 and STAT3 in HepG2 cells induced by alcohol.
